# Supplementary material for: Karyotypic and molecular evidence supports the endemic Tibetan hamsters as a separate divergent lineage of Cricetinae
Source: PubMed Central journal article supplement (PMC8131748; doi:10.1038/s41598-021-89890-1), 2021-05-18
Supplement: 41598_2021_89890_MOESM1_ESM.pdf [file 41598_2021_89890_MOESM1_ESM.pdf]

## Molecular-phylogenetic analysis: experimental part

The specimen Q18-90 of *Urocricetus kamensis* from Qinghai was analysed for 25 nuclear loci and mitochondrial cytochrome *b* gene (*Cytb*). For phylogenetic analysis 175 sequences of different genes of Cricetinae and Arvicolinae were retrieved from GenBank (Table S1).

Total DNA was extracted from ethanol preserved tissues using standard protocol of proteinase K digestion, phenol-chloroform deproteinization and isopropanol precipitation<sup>1</sup>. We sequenced fragments of 25 nuclear loci (Table S2) and 1140 bp of *Cytb*. The 20 original primers were specially designed for amplification and sequencing nuclear genes in this study and the other 10 primers were used from our previous publication<sup>2</sup>. The information about the primers used for amplification and sequencing of nuclear genes are provided in Table S2. Mitochondrial *Cytb* gene was amplified and sequenced using combination of primers L14729<sup>3</sup> and H15985<sup>4</sup>.

Polymerase chain reaction (PCR) usually entailed 35 thermal cycles as follows: 94°C for 3 min, 30 cycles of 94°C for 30 s, 55–60°C depending on the primers for 1 min, 72°C for 1 min and a final extension of 72°C for 6 min. PCR products were visualized on 1% agarose gel and then purified using ammonium acetate/ethanol precipitation. Approximately 10–40 ng of the purified PCR product was used for Sanger sequencing with corresponding primers using BigDye™ Terminator v. 3.1 kit (Applied Biosystems, ThermoFisher Scientific), cycle sequencing products were analyzed on 3100-Avant Genetic Analyzer (Applied Biosystems, ThermoFisher Scientific). New sequences were deposited in GenBank under the Accession numbers MW863312-MW863331 and MZ018044-MZ018045.

## Optimum models and partition schemes as inferred with ModelFinder

### Edge-linked model

HKY+F+G4: acp5\_1 adra2b\_1 bche\_1 dmp1\_1 ghr\_1 irbp\_1 NHSL1\_1 vwf\_1,  
HKY+F+I: acp5\_2 adra2b\_2 adrb2\_1 atp7a\_1 Cmyc\_1 cnr1\_1 lcat\_1 NHSL1\_2 rag1\_1  
rag2\_1 rag2\_2 thy\_2 acox2\_1 rogdi2\_1,  
TVM+F+G4: acp5\_3 adrb2\_3 Cmyc\_3 cnr1\_3 dmp1\_3 irbp\_3 lcat\_3 NHSL1\_3 PRF\_3  
vwf\_3 acpt\_3 rogdi2\_3,  
K2P: adra2b\_3 brca2\_1 brca2\_2 chy\_3,  
HKY+F+I: adrb2\_2 bche\_2 Cmyc\_2 cnr1\_2 lcat\_2 rag1\_2 acox2\_2 acpt\_2 rogdi2\_2,  
TPM3u+F+G4: ApoB\_1 ApoB\_2 atp7a\_3 enam\_1 enam\_2 ghr\_2 irbp\_2 PRF\_2 rag2\_3  
vwf\_2 thy\_3,  
K3Pu+F: ApoB\_3 bche\_3 brca1\_3 brca2\_3 enam\_3,  
K2P: atp7a\_2 thy\_1 acpt\_1,  
TPM3+F+G4: brca1\_1 brca1\_2 dmp1\_2 PRF\_1 chy\_1 chy\_2,  
K2P+G4: ghr\_3 rag1\_3 acox2\_3;

### Edge-unlinked model

HKY+F+G4: acp5\_1 acp5\_2 adra2b\_1 adra2b\_2 atp7a\_1 Cmyc\_1 cnr1\_1 dmp1\_1 dmp1\_2  
ghr\_1 irbp\_1 lcat\_1 NHSL1\_1 NHSL1\_2 rag1\_1 rag2\_1 vwf\_1 thy\_2 acox2\_1 rogdi2\_1,

TVM+F+G4: acp5\_3 adrb2\_3 Cmyc\_3 cnr1\_3 dmp1\_3 irbp\_3 lcat\_3 NHSL1\_3 PRF\_3  
vwf\_3 acpt\_3 rogdi2\_3,

K3Pu+F+G4: adra2b\_3 ApoB\_3 atp7a\_3 bche\_3 brca1\_3 brca2\_1 brca2\_2 brca2\_3 enam\_3  
ghr\_3 rag1\_3 rag2\_3 thy\_3 chy\_3,

TIM3+F+G4: adrb2\_1 ApoB\_1 ApoB\_2 bche\_1 brca1\_1 brca1\_2 enam\_1 enam\_2 ghr\_2  
irbp\_2 PRF\_1 PRF\_2 vwf\_2 acox2\_3 chy\_1 chy\_2,

HKY+F+I: adrb2\_2 atp7a\_2 bche\_2 Cmyc\_2 cnr1\_2 lcat\_2 rag1\_2 rag2\_2 thy\_1 acox2\_2  
acpt\_1 acpt\_2 rogdi2\_2;

**Table S1.** Sequences of 25 genes of Cricetinae and Arvicolinae retrieved from GenBank

| taxon                | <i>Mesocricetus auratus</i> | <i>Cricetulus (barabensis) griseus</i> | <i>Phodopus ex gr. sungorus</i> | <i>Peromyscus sp.</i> | <i>Sigmodon sp.</i> | <i>Ondatra zibethica</i> | <i>Ellobius talpinus</i> |
|----------------------|-----------------------------|----------------------------------------|---------------------------------|-----------------------|---------------------|--------------------------|--------------------------|
| <b><i>IRBP</i></b>   | XM_005077637                | XM_003495318                           | MCBN011438683                   | XM_006976708          | EU635706            | PVIU01008887             | LOEQ01001095             |
| <b><i>GHR</i></b>    | XM_021223302                | NW_003615594                           | AF540640                        | AY294927              | AF540641            | AY294925                 | LOEQ01002004             |
| <b><i>RAG1</i></b>   | NW_004801605                | NW_003613649                           | AY294954                        | NW_006501249          | PVIH01014872        | PVIU01000102             | LOEQ01000880             |
| <b><i>vWF</i></b>    | AM000038                    | NW_003613610                           | AM000049                        | NW_006501387          | PVIH01003003        | PVIU01007885             | LOEQ01000305             |
| <b><i>ACP5</i></b>   | NW_004801687                | NW_003613752                           | MCBN011090803                   | NW_006501211          | PVIH01006689        | PVIU01021838             | LOEQ01010708             |
| <b><i>ADRA2B</i></b> | XM_005068583                | JN413823                               | MCBN011457443                   | NW_006501332          | PVIH01000347        | PVIU01003202             | LOEQ01001076             |
| <b><i>ADRB2A</i></b> | NM_001281948                | XM_027402776                           | MCBN011302936                   | NW_006501285          | PVIH01008008        | PVIU01015722             | LOEQ01008323             |
| <b><i>ApoB</i></b>   | XM_005079084                | JN414053                               | MCBN011457950                   | NW_006501198          | PVIH01000734        | PVIU01009474             | LOEQ01003299             |
| <b><i>ATP7A</i></b>  | XM_005085950                | XM_027432881                           | MCBN010385154                   | XM_028886391          | PVIH01006094        | PVIU01013763             | LOEQ01007111             |
| <b><i>BCHE</i></b>   | XM_005076132                | XM_027391787                           | MCBN011456050                   | XM_028867195          | PVIH01025287        | PVIU01010962             | LOEQ01003330             |
| <b><i>BRCA2</i></b>  | XM_005083192                | AF344828                               | MCBN011414582                   | NW_006501358          | PVIH01000989        | PVIU01006456             | LOEQ01001245             |
| <b><i>C-myc</i></b>  | AY294985                    | XM_027431576                           | AY294984                        | AY294987              | AY241507            | AY294983                 | LOEQ01001897             |
| <b><i>CNRI</i></b>   | FM162115                    | XM_027403411                           | MCBN011420962                   | XM_028872768          | PVIH01002493        | PVIU01004414             | LOEQ01002601             |
| <b><i>DMP1</i></b>   | XM_005076371                | XM_003515794                           | MCBN011443965                   | NW_006501096          | PVIH01026867        | PVIU01006332             | LOEQ01003140             |
| <b><i>ENAM</i></b>   | XM_013111988                | XM_027389235                           | MCBN011450537                   | XM_028863880          | PVIH01000500        | PVIU01007871             | LOEQ01006989             |
| <b><i>LCAT</i></b>   | NW_004801665                | NW_003614050                           | MCBN011461676                   | XM_016005372          | PVIH01002868        | PVIU01001027             | LOEQ01006413             |
| <b><i>RAG2</i></b>   | FM162083                    | XM_003497461                           | MCBN011294972                   | XM_028895024          | PVIH01013589        | PVIU01000102             | LOEQ01000880             |
| <b><i>THY1</i></b>   | NW_004801668                | NW_003614007                           | MCBN011148372                   | NW_006501182          | PVIH01021320        | PVIU01003711             | LOEQ01020783             |
| <b><i>ACOX2</i></b>  | NW_004801666                | NW_003614849                           | MCBN011419051                   | NW_006501835          | PVIH01010875        | PVIU01000936             | LOEQ01003411             |
| <b><i>ACPT</i></b>   | NW_004801779                | NW_003614844                           | MCBN011447908                   | NW_006501325          | PVIH01021081        | PVIU01011672             | LOEQ01000613             |
| <b><i>CHY</i></b>    | NW_004801798                | NW_003613875                           | MCBN011422187                   | NW_006501413          | PVIH01018789        | PVIU01002672             | LOEQ01006019             |
| <b><i>NHSL1</i></b>  | NW_004801608                | NW_003613627                           | MCBN011242668                   | NW_006501322          | PVIH01001607        | PVIU01001783             | LOEQ01000757             |
| <b><i>PRF</i></b>    | NW_004801628                | NW_003613759                           | MCBN011219196                   | NW_006501061          | PVIH01000933        | PVIU01000824             | LOEQ01002017             |
| <b><i>ROGD12</i></b> | NW_004801720                | NW_003614230                           | MCBN011010330                   | NW_006501272          | PVIH01025150        | PVIU01001008             | LOEQ01008065             |

**Table S2.** The primers used for amplification and sequencing of nuclear genes

| gene    |               | forward primer |                                                         | reverse primer |                                                      | annealing T | product length | alignment length (exons only) | internal primers |           |
|---------|---------------|----------------|---------------------------------------------------------|----------------|------------------------------------------------------|-------------|----------------|-------------------------------|------------------|-----------|
| brca1   | exon          | F50            | *****                                                   | R1120          | *****                                                | 56,4        | 1041           | 1026                          | R500             | F625      |
| irbp    | exon          | F11            | *****                                                   | R22Cr          | *****                                                | 59,5        | 942            | 903                           |                  |           |
| ghr     | exon          | GHR_F          | *****                                                   | GHR_R          | *****                                                | 56,1        | 909            | 861                           | F485             | R556      |
| rag1    | exon          | rag1_all940 F  | *****                                                   | cm_2370a_R     | *****                                                | 59,3        | 1499           | 1446                          | cm_1800R         | cm_167 2F |
| vwf     | exon          | vwf_ae_f       | *****                                                   | vwf_cri_r      | *****                                                | 58,1        | 793            | 747                           |                  |           |
| acp5    | exon & intron | F20a           | GTRCTGCTGGGCCTGCAAATCAT                                 | R620a          | CAGCGCTTGGAGATCTTGGAGTA                              | 59,2        | 588            | 315                           |                  |           |
| adra2b  | exon          | F1376a         | CAACCCTGGCCTCYCCTCTGTCTT                                | R1894a         | GCARTAGCCRATCCARAAGAAGAAC                            | 60,2        | 545            | 462                           |                  |           |
| adrb2a  | exon          | F217a          | ATCGCTACATTGCTATCACATCG<br>GTGTAARGCYCAATATAAAAAGAA     | R750b          | TAGCCCAACCAGTTAAGGAGGATG<br>CCGTGACAAATGAAGAGGAAGAAA | 56,9        | 559            | 495                           |                  |           |
| apob    | exon          | F9632a         | CAGAG<br>CTCATCTGATCACMGAGAGGAAAT                       | R10260d        | G<br>CTTCAATTRCTTCTCGCAAGGTTTC                       | 54,0        | 597            | 540                           |                  |           |
| atp7a   | exon          | F25a           | AAAG                                                    | R632b          | GGAGCAGCTTCAGTGAGCTTACATT                            | 55,2        | 660            | 597                           |                  |           |
| bche    | exon          | F197a          | CAAGGTCTGAAAATGTCTTGGTAAAC                              | R805b          | AGTATCTGGTTTACTCTTTGTGTTTT<br>G                      | 55,3        | 640            | 573                           |                  |           |
| brca2   | exon          | F5132a         | TGTGTCAGTGAGTCTTCTATCCAA<br>GAGGAAGAACAAGAAGATGAGGAAG   | R5735a         | G<br>GTTYCGAAGCTGTTCGAGTTTGTG                        | 52,1        | 627            | 573                           |                  |           |
| c-myc   | exon          | F01_cric       | AAAT                                                    | R535_Cric      | CCAAGGAGAGGCARCACRGAAT                               | 58,5        | 555            | 483                           |                  |           |
| cnr1    | exon          | F18a           | CCCTCAARAATTCCCTCTGACTTCCT<br>GGGACAGAAGCTGATAAGGAAGATG | H623a          | A<br>GACTCGCTCCTGCTTTCCTCCTTG                        | 59,1        | 633            | 561                           |                  |           |
| dmp1    | exon          | F312a          | ACTTTCCMATATATACTCCAGGTCCT                              | R918a          | GTTAGTTTATTCTCTGAGATGTTTCT                           | 58,8        | 623            | 555                           |                  |           |
| enam    | exon          | F2020a         | ACTAT                                                   | R2620a         | TTGAC<br>CTTCCCATAAGCRGCRATACATCTCCT                 | 54,7        | 637            | 567                           |                  |           |
| lcat    | exon & intron | F55a           | GGRTSGACTGCTGGATTGATAATAC                               | R610a          | CT                                                   | 58,4        | 560            | 246                           |                  |           |
| rag2    | exon          | F292a          | GTCTTGCCAGGAGGAATMTCTGTCTC                              | R863a          | GTGCCMTCTCCATGAGAACAGTAG<br>GGCAACAGGGTAGGAGAAATAAGG | 55,9        | 606            | 534                           |                  |           |
| thy     | exon & intron | THY_F1b        | GCCTAACCATCAACACCACCATCTG                               | THY_R2c        | A                                                    | 54,4        | 612            | 126                           |                  |           |
| ACOX2   | exon & intron | acox_F         | GGGCTGTGHAYCACAAACTCCT                                  | acox_R2c       | GCTCAGATGAGCAGATTGCTAAATG                            | 56,6        | 526            | 96                            |                  |           |
| ACPT    | exon & intron | acpt_f1b       | CTTRCCTGGCAGATCARTGTGTC                                 | acpt_r2a       | GAGGACAAGGTCAGRRGGCTGGAT<br>GACTCTGCAAGAGGTGAAGATGA  | 60,7        | 571            | 150                           |                  |           |
| CHY     | exon & intron | CHY_R1         | GGTAATGGGAGATTCKGGTGAAG                                 | CHY_F3         | G                                                    | 56,4        | 546            | 168                           |                  |           |
| NHSL1   | exon          | nhsl1_F        | CAACGGGCAGGTGCTCAACGAGAG<br>CAARGCCTGYGAGGAGAAGAAGAAA   | nhsl1_R        | ACTTCTCTCYGGRACCTTGGGCTTG                            | 59,3        | 596            | 531                           |                  |           |
| PRF     | exon          | prf_F1a        | C                                                       | prf_R2a        | CTCAACTCCTGGCCACCAAAGAA                              | 59,4        | 522            | 456                           |                  |           |
| ROGDI-2 | exon & intron | rogdi_F1b      | GCTSATGGAYGICYGTGATGCTG                                 | rogdi_R        | CACGGTGAGGCASAGCTTGTGA                               | 59,6        | 515            | 114                           |                  |           |

\*\*\*\*\* primer sequence is given in Ref.<sup>2</sup>

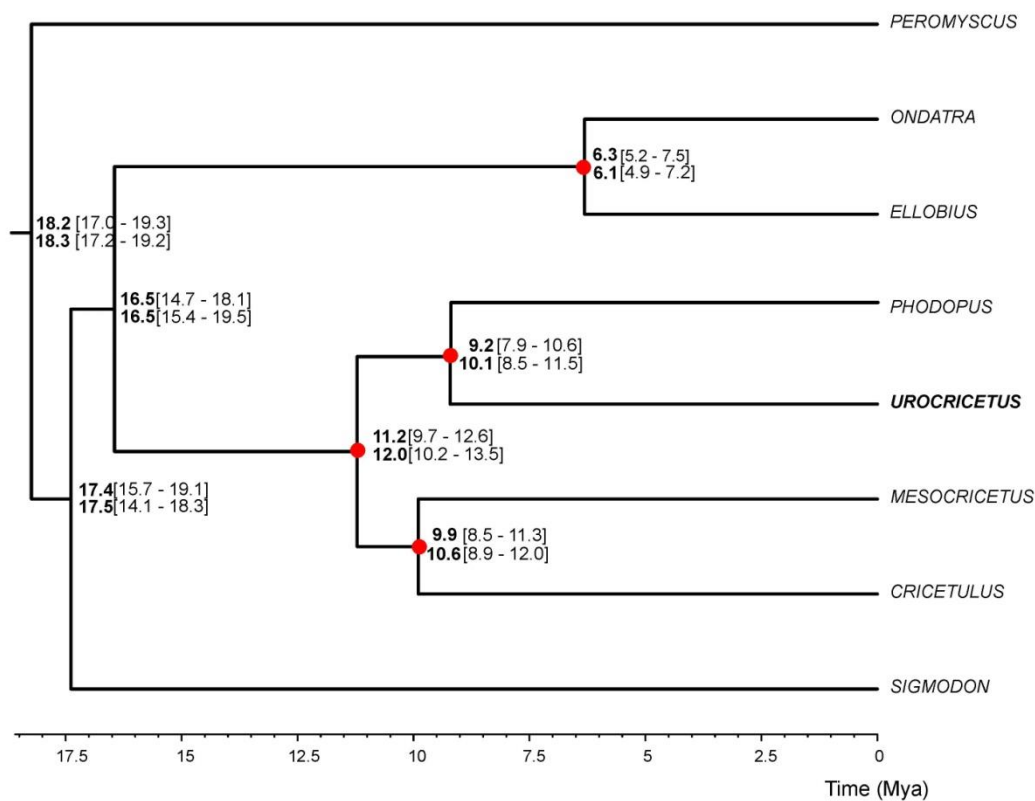

**Figure S1.** Timescale of major divergence events among Cricetinae taxa as inferred from BEAST analysis under two relaxed-local-clock models based on concatenated alignment of 25 nuclear genes. The median posterior estimate of age (Mya) and 95% height posterior density (HPD) intervals are shown to the right of the nodes (top numbers: the uncorrelated log-normal clock, bottom numbers: the random local clock). The filled red circles denote highly supported nodes in both analyses (Bayesian posterior probabilities >0.99). Representatives of subfamilies Arvicolinae, Sigmodontinae, and Neotominae serve as outgroups.

## References

1. Eschbach, S., Hofmann, C., Maerz, M., Maier, U.-G. & Sitte, P. Molecular Cloning. A Laboratory Manual. 2. Auflage. Hrsg. von J. Sambrook, E. F. Fritsch, T. Maniatis, Cold Spring Harbor Laboratory Press, Cold Spring Harbour 1989, \$ 115. ISBN 0-87969-309-6. *Biol. unserer Zeit* **20**, 285–285 (1990).
2. Lebedev, V. S. *et al.* Molecular phylogenetics and taxonomy of dwarf hamsters *Cricetulus* Milne-Edwards, 1867 (Cricetidae, Rodentia): Description of a new genus and

- reinstatement of another. *Zootaxa* **4387**, 331–339 (2018).
3. Lebedev, V. S., Bannikova, A. A., Tesakov, A. S. & Abramson, N. I. Molecular phylogeny of the genus *Alticola* (Cricetidae, Rodentia) as inferred from the sequence of the cytochrome b gene. *Zool. Scr.* **36**, 547–563 (2007).
  4. Ohdachi, S., Dokuchaev, N. E., Hasegawa, M. & Masuda, R. Intraspecific phylogeny and geographical variation of six species of northeastern Asiatic *Sorex* shrews based on the mitochondrial cytochrome b sequences. *Mol. Ecol.* **10**, 2199–2213 (2001).
